# Supplementary material for: Electrically and electrohydrodynamically driven phase transition and structural color switching of oligomer tethered 2D colloid
Source: Royal Society of Chemistry journal article supplement (doi:10.1039/c8ra02186d), 2018-01-01
Supplement: c8ra02186d4.pdf [file c8ra02186d4.pdf]

## Electronic Supplementary Information (ESI)

### Electrically and Electrohydrodynamically driven Phase Transition and Structural Color Switching of Oligomer Tethered 2D Colloid

Aurangzeb Rashid Masud<sup>a</sup>, Seung-Ho Hong<sup>b</sup>, Tian-Zi Shen<sup>a</sup>, Amir Shahzad<sup>a</sup> and Jang-Kun Song<sup>\*a</sup>

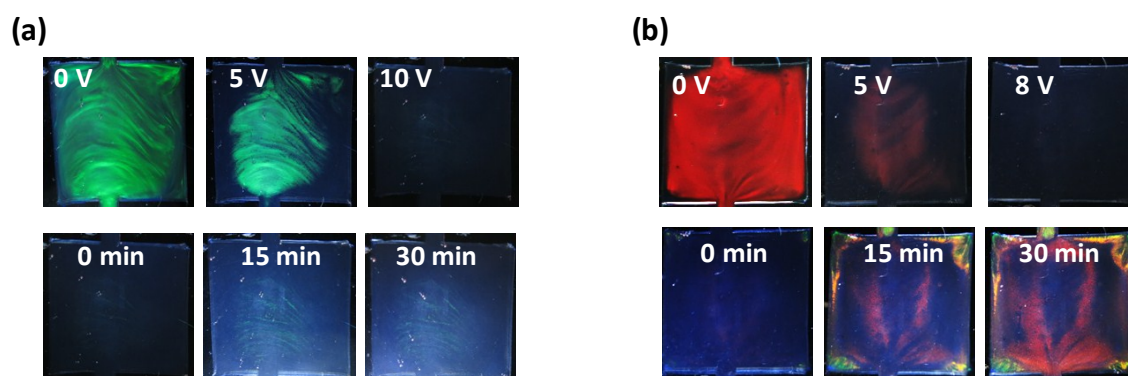

**Figure S1:** (a) Removal of photonic crystals by applying 10 kHz vertical field (top), and its little recovery after removing the field for a green photonic crystal cell. (b) The same process was tried for a red cell. Its recovery was slightly better.

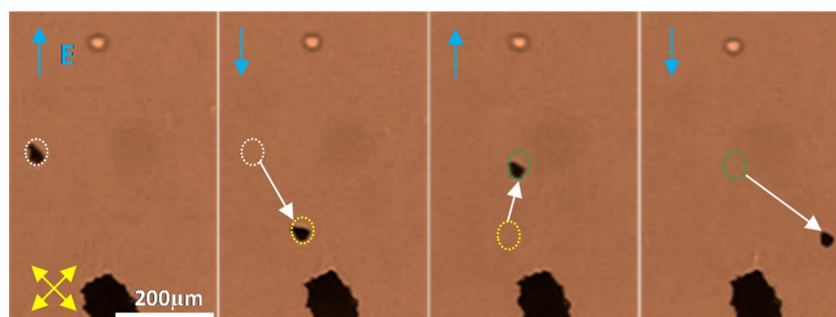

**Figure S2:** CNT particle motion under 1 Hz electric field application in ZrP colloid added by small amount of CNT. It visualizes better the oscillatory motion of colloid.

**Video clip M-1:** Microscopic observation of the type-A cell under the application of 1 Hz 10 V and crossed polarizers. It shows steady flow of particles. Its focus is near the top surface of the cell. Approximately 4 mm from the left end to right end of the video clip.

**Video clip M-2:** Macroscopic observation for the switching of a type-B cell. Initially 10 kHz 10 V signal is applied, and it changes to 1 Hz 10 V signal at 4 seconds, to 10 kHz at 12 seconds, to 1 Hz at 30 seconds, and to 10 kHz at 36 seconds, repeatedly.

**Video clip M-3:** Microscopic observation of the type-B cell under the crossed polarizers. Initially, 1 Hz 10 V is applied and it shows periodic flow of colloids, leftwards and rightwards. At 6 seconds, the signal changes to 10 kHz 10 V, and no flow motion is observed while the birefringence is large. At 19 seconds, the signal changes to 1 Hz again.
